# Supplementary material
Source: PubMed Central journal article supplement (PMC5512163)
Supplement: NIHMS875143-supplement-Supplement.pdf [file NIHMS875143-supplement-Supplement.pdf]

## Supplementary Appendix

This appendix has been provided by the authors to give readers additional information about their work.

Supplement to: Fagin JA, Wells SA Jr. Biologic and clinical perspectives on thyroid cancer. *N Engl J Med* 2016; 375:1054-67. DOI: [10.1056/NEJMra1501993](https://doi.org/10.1056/NEJMra1501993)

## TABLE S1

### *RET* Germline Mutations

#### Classical MEN2A

**Families or single patients with germline *RET* mutations, MTC, and either pheochromocytomas, or hyperparathyroidism, or both. Includes families or patients with *RET* codon mutations, or chromosomal alterations activating *RET*, including: deletions, insertions, duplications, multiple mutations, and homozygous mutations.**

#### **Codon Mutations:**

**Exon 5:** (*V292M*<sup>1</sup>), **Exon 8:** (*G533C*<sup>2-7</sup>), **Exon 10:** (*C609F*<sup>8,9</sup>/*G*<sup>10-13</sup>/*R*<sup>9,14</sup>/*S*<sup>15-19</sup>/*Y*<sup>9,20-23</sup>, *C611R*<sup>24</sup>/*S*<sup>25</sup>/*W*<sup>26</sup>/*Y*<sup>21,27,28</sup>, *C618F*<sup>24,29,30</sup>/*G*<sup>24,31</sup>/*R*<sup>26,30,32-34</sup>/*S*<sup>30,35-39</sup>/*Y*<sup>24</sup>, and *C620F*<sup>24</sup>/*R*<sup>24,32</sup>/*S*<sup>40-42</sup>/*Y*<sup>43</sup>), **Exon 11:** (*C630R*<sup>44,45</sup>/*Y*<sup>46</sup>, *D631Y*<sup>47-50</sup>, *C634F*<sup>24,30,31,51,52</sup>/*G*<sup>24,31,52-55</sup>/*R*<sup>30,43,52,54-59</sup>/*S*<sup>57</sup>/*W*<sup>51,52,55,59,60</sup>/*Y*<sup>51,52,54,55,57,59,61</sup>, *S649L*<sup>62-64</sup>, and *K666E*<sup>65,66</sup>), **Exon 13:** (*L790F*<sup>67</sup> and *Y791F*<sup>68-70</sup>), **Exon 14:** (*V804L*<sup>71-73</sup> and *V804M*<sup>74-82</sup>), and **Exon 15:** (*S891A*<sup>83,84</sup>)

#### **Deletions/insertions:**

**Exon 11:** (*D631del*) of a 3 base pair (bp) segment, GAC; aspartic acid<sup>85</sup>), **Exon 11/Exons 4-16:** (*C634R*/and a large intragenic deletion of the normal allele; a somatic mutation which occurred only in a metastasis.<sup>86</sup>)

#### **Duplications:**

**Exon 11:** (in frame duplication of 9 bp, The codons 634,635, and 636 were repeated before the normal sequence was continued, resulting in an extra cysteine residue.<sup>87</sup>), **Exon 11:** (heterozygous mutation in exon 11 of the *RET* proto-oncogene representing a duplication of 12 bp. After the first base of codon 635 the previous 12 bp are repeated, resulting in the insertion of four amino acids between codon 634 (Cys) and 635 (Arg). This results in a new histidine codon (CAC) at the 5' breakpoint and creates an additional cysteine at the 3' end of the insertion. The codons for glutamine and leucine in the middle of the duplicated part are conserved.<sup>88</sup>)

#### **Double mutations:**

**Exon 10/Exon 13:** (*C620F*)/*Y791F*<sup>89</sup>), **Exon 11/Exon 11:** (*C634S*/*A641S*<sup>90</sup>), **Exon 11/Exon 11:** (*C634R*/*V648I*<sup>91</sup>), **Exon 11/Exon 11:** (*C634W*/*R635G*<sup>61</sup>), **Exon 11/Exon 11:** (*C634R*/*A640G*<sup>92</sup>), **Exon 11/Exon 13:** (*C634Y*/*Y791F*<sup>93</sup>), **Exon 11/Exon 11:** (*C634W*/*S649L*<sup>62</sup>)

#### **Combined germline and somatic *RET* mutations:**

**Exon 11/Exon 16:** (*C634S*/*M918T*<sup>94</sup>), **Exon 11/Exon 16:** (*C634R*/*M918T*<sup>94</sup>)

#### **Triple mutations:**

**Exon 11 /Exon 14/Exon 14:** (*D631Y*/*S819I*/*E843D*<sup>95</sup>), and **Exon 11/Exon 11/Exon 11:**

(C634R/A640G/M700L<sup>96\*</sup>)

**Quadruple mutation:**

**Exon 2/Exon 5/Exon11/Exon18:**(R67H/V292M/C634Y/R982C<sup>97\*</sup>)

**Homozygous mutation: Exon 14:** (V804L<sup>73</sup>)

**MEN2A with Hirschsprung's Disease**

**Exon 10:** (C609F<sup>8,9</sup>/G<sup>10-13</sup>/R<sup>9,14</sup>/S<sup>15-19</sup>/Y<sup>9,20-23</sup>, C611R<sup>24</sup>/S<sup>25</sup>/W<sup>26</sup>/Y<sup>21,27,28</sup>  
C618F<sup>24,29,30</sup>/G<sup>24,31</sup>/R<sup>26,30,32-34</sup>/S<sup>30,35-39</sup>/Y<sup>24</sup>, and C620F<sup>24</sup>/R<sup>24,32</sup>/S<sup>40-42</sup>/Y<sup>43</sup>)

**MEN2A with Cutaneous Lichen Amyloidosis**

**Exon 11:** C634F<sup>24,30,31,51,52</sup>/G<sup>24,31,52-55</sup>/R<sup>30,43,52,54-59</sup>/S<sup>57</sup>/W<sup>51,52,55,59,60</sup>/Y<sup>51,52,54,55,57,59,61</sup>

**FMTC**

**FMTC-1: Includes families who meet the original strict criteria defining this syndrome.**<sup>98</sup>

**Codon Mutations:**

**Exon 10:** (C611F<sup>11,55,99</sup>), **Exon 13:** (E768D<sup>100-104</sup>), and **Exon 16** (R912P<sup>105</sup>)

**FMTC-2: Small families (of at least 2 generations, with at least 2 but less than 10 RET gene carriers) who have MTC but not pheochromocytoma or hyperparathyroidism. Includes families or patients with RET codon mutations, or chromosomal alterations activating RET, including: deletions, insertions, duplications, multiple mutations, and homozygous mutations.**

**Codon Mutations:**

**Exon 5:** (G321R<sup>106\*</sup>), **Exon 8:** (C515S<sup>107</sup>), **Exon 10:** (K603Q<sup>108\*</sup>, Y606C<sup>65,109</sup>, and C611G<sup>110</sup>), **Exon 11:** (K666M<sup>111</sup>, **Exon 13:** (R770Q<sup>112\*</sup>, Q781R<sup>113\*</sup>, Y791N<sup>112\*</sup>, N777S<sup>114</sup>), and **Exon 15:** L881V<sup>112</sup>, and R886W<sup>28\*</sup>.

**Duplications, insertions, and deletions:**

**Exon 8:** (after codon 531 the previous 9-bp sequence [AGGAGTGTG] is repeated, and then the normal sequence is continued, resulting in addition of a new cysteine codon.<sup>115</sup>, **Exon 11:** (R635-T636 insertion of E, L, C, and R amino acids and missense T636P<sup>65\*</sup>), **Exon 11/Exons 4-16:** (C634R/and a large intragenic deletion of the normal allele, leading to LOH, the latter a somatic mutation which occurred only in metastases<sup>86\*</sup>, and K666N<sup>116</sup>, also (delGinsTTCT) leading to an Asn to Lys change [K666N] and to a serine insertion at codon 667<sup>117</sup>)

**Double mutations:**

**Exon 14/Exon14:** (V804M/R844L<sup>118\*</sup>), **Exon13/Exon14:** (V778I/V804M<sup>119\*</sup>), **Exon**

**14/Exon16:** (*V804L/M918T*<sup>120\*</sup>) **Exon 11/Exon 14:** (*S649L/V804L*<sup>62\*</sup>)

**Combined germline and *M918T* somatic mutations:**

**Exon 10/Exon 16:** (*C618R/M918T*<sup>94</sup>), **Exon 10/Exon 16:** (*R620R/M918T*<sup>94</sup>), Exon 14/Exon 16: (*V804L/M918T*)<sup>120</sup>

**Triple mutations:**

**Exon 2/Exon 5/Exon16:** (*R67H/V292M/R982C*<sup>97\*</sup>)

**Homozygous mutations: Exon 14:** (*V804M*<sup>121</sup>) and **Exon 14:** (*A833T*<sup>122</sup>)

**FMTC-3: Single individuals or small families with 2 or less members with MTC in a single generation with no evidence of pheochromocytoma or hyperparathyroidism.**

**Codon Mutations: Exon 8:**

(*A510V*<sup>116</sup>, *E511K*<sup>116</sup>, *C531R*<sup>116</sup>), **Exon 10:** (*R600Q*<sup>123</sup> and *C620W*<sup>124\*</sup>), **Exon 11:** (*C630F/R/S/Y*<sup>40,125,126</sup>, *E632K*<sup>127</sup>), **Exon 13:** (*V778I*<sup>128\*</sup>), and **Exon 14:** (*E819K*<sup>9\*</sup>, *R833C*<sup>129</sup>, *R844Q*<sup>9\*</sup>, *M848T*<sup>130\*</sup>, and *S904F*<sup>130\*</sup>).

## MEN2B

**Includes families with the typical phenotype who have either *RET* germline mutations or double mutations:**

**Codon Mutations:**

**Exon 15:** (*A883F*<sup>131,132</sup>), and **Exon 16:** (*M918T*<sup>133-135</sup>),

**Double mutations:**

**Exon 14/Exon14:** (*V804M/Y806C*<sup>136,137</sup>), **Exon 14/Exon 14:** (*V804M/E805K*<sup>138</sup>), **Exon 14/Exon 15:** (*V804M/S904C*<sup>139</sup>), **Exon 13/Exon 14:** (*V804M/Q781R*<sup>140</sup>), **Exon 13/Exon 16:** (*Y791F/M918T*<sup>57,89</sup>), and **Exon 16/Exon16:** (*M918T/S922Y*<sup>141</sup>)

1. Castellone MD, Verrienti A, Magendra Rao D, et al. A novel de novo germ-line V292M mutation in the extracellular region of RET in a patient with pheochromocytoma and medullary thyroid carcinoma: functional characterization. *Clinical endocrinology* 2010;73:529-34.
2. Da Silva AM, Maciel RM, Da Silva MR, Toledo SR, De Carvalho MB, Cerutti JM. A novel germ-line point mutation in RET exon 8 (Gly(533)Cys) in a large kindred with familial medullary thyroid carcinoma. *The Journal of clinical endocrinology and metabolism* 2003;88:5438-43.
3. Kaldrymides P, Mytakidis N, Anagnostopoulos T, et al. A rare RET gene exon 8 mutation is found in two Greek kindreds with familial medullary thyroid carcinoma: implications for screening. *Clinical endocrinology* 2006;64:561-6.

4. Bethanis S, Koutsodontis G, Palouka T, et al. A newly detected mutation of the RET protooncogene in exon 8 as a cause of multiple endocrine neoplasia type 2A. *Hormones (Athens)* 2007;6:152-6.
5. Peppas M, Boutati E, Kamakari S, et al. Multiple endocrine neoplasia type 2A in two families with the familial medullary thyroid carcinoma associated G533C mutation of the RET proto-oncogene. *European journal of endocrinology / European Federation of Endocrine Societies* 2008;159:767-71.
6. Oliveira MN, Hemerly JP, Bastos AU, et al. The RET p.G533C mutation confers predisposition to multiple endocrine neoplasia type 2A in a Brazilian kindred and is able to induce a malignant phenotype in vitro and in vivo. *Thyroid : official journal of the American Thyroid Association* 2011;21:975-85.
7. Castro MR, Thomas BC, Richards ML, Zhang J, Morris JC. Multiple Endocrine Neoplasia Type 2A Due to an Exon 8 (G533C) Mutation in a Large North American Kindred. *Thyroid : official journal of the American Thyroid Association* 2013.
8. Oriola J, Biarnes J, Hernandez C, Simo R. Clinical spectrum of MEN2A in a large family caused by the infrequent RET mutation Cys609Phe. *Clinical genetics* 2012.
9. Paszko Z, Sromek M, Czetwertynska M, et al. The occurrence and the type of germline mutations in the RET gene in patients with medullary thyroid carcinoma and their unaffected kindred's from Central Poland. *Cancer investigation* 2007;25:742-9.
10. Quayle FJ, Fialkowski EA, Benveniste R, Moley JF. Pheochromocytoma penetrance varies by RET mutation in MEN 2A. *Surgery* 2007;142:800-5; discussion 5 e1.
11. Frank-Raue K, Hoppner W, Frilling A, et al. Mutations of the ret protooncogene in German multiple endocrine neoplasia families: relation between genotype and phenotype. German Medullary Thyroid Carcinoma Study Group. *The Journal of clinical endocrinology and metabolism* 1996;81:1780-3.
12. Fitze G, Schreiber M, Hohenberger W, Hummer HP, Roesner D, Schackert HK. Interaction of RET proto-oncogene codon 609 germline mutations with RET haplotypes characterized by c.135G>A alleles modifying MEN 2A or HSCR phenotypes. *American journal of medical genetics Part A* 2004;129A:323-5.
13. Simon S, Pavel M, Hensen J, Berg J, Hummer HP, Carbon R. Multiple endocrine neoplasia 2A syndrome: Surgical management. *Journal of pediatric surgery* 2002;37:897-900.
14. Koch CA, Brouwers FM, Vortmeyer AO, et al. Somatic VHL gene alterations in MEN2-associated medullary thyroid carcinoma. *BMC cancer* 2006;6:131.
15. Igaz P, Patocs A, Racz K, Klein I, Varadi A, Esik O. Occurrence of pheochromocytoma in a MEN2A family with codon 609 mutation of the RET proto-oncogene. *The Journal of clinical endocrinology and metabolism* 2002;87:2994.
16. Kinlaw WB, Scott SM, Maue RA, et al. Multiple endocrine neoplasia 2A due to a unique C609S RET mutation presents with pheochromocytoma and reduced penetrance of medullary thyroid carcinoma. *Clinical endocrinology* 2005;63:676-82.
17. Klein I, Esik O, Homolya V, Szeri F, Varadi A. Molecular genetic diagnostic program of multiple endocrine neoplasia type 2A and familial medullary thyroid carcinoma syndromes in Hungary. *The Journal of endocrinology* 2001;170:661-6.

18. Patocs A, Karadi E, Toth M, et al. Clinical and biochemical features of sporadic and hereditary pheochromocytomas: an analysis of 41 cases investigated in a single endocrine centre. *Eur J Cancer Prev* 2004;13:403-9.
19. Mian C, Barollo S, Zambonin L, et al. Characterization of the largest kindred with MEN2A due to a Cys609Ser RET mutation. *Familial cancer* 2009;8:379-82.
20. Calva D, O'Dorisio TM, Sue O'Dorisio M, et al. When is prophylactic thyroidectomy indicated for patients with the RET codon 609 mutation? *Annals of surgical oncology* 2009;16:2237-44.
21. Mulligan LM, Eng C, Healey CS, et al. Specific mutations of the RET proto-oncogene are related to disease phenotype in MEN 2A and FMTC. *Nature genetics* 1994;6:70-4.
22. Yip L, Cote GJ, Shapiro SE, et al. Multiple endocrine neoplasia type 2: evaluation of the genotype-phenotype relationship. *Arch Surg* 2003;138:409-16; discussion 16.
23. Zaydfudim V, Stover DG, Caro SW, Phay JE. Presentation of a medullary endocrine neoplasia 2A kindred with Cushing's syndrome. *The American surgeon* 2008;74:659-61.
24. Wells SA, Jr., Chi DD, Toshima K, et al. Predictive DNA testing and prophylactic thyroidectomy in patients at risk for multiple endocrine neoplasia type 2A. *Annals of surgery* 1994;220:237-47; discussion 47-50.
25. Nishikawa M, Murakumo Y, Imai T, et al. Cys611Ser mutation in RET proto-oncogene in a kindred with medullary thyroid carcinoma and Hirschsprung's disease. *European journal of human genetics : EJHG* 2003;11:364-8.
26. Donis-Keller H, Dou S, Chi D, et al. Mutations in the RET proto-oncogene are associated with MEN 2A and FMTC. *Human molecular genetics* 1993;2:851-6.
27. Bahlo M, Schott M, Kaminsky E, Cupisti K. [Multiple endocrine neoplasia 2a: late manifestation of a newly-discovered mutation]. *Dtsch Med Wochenschr* 2008;133:464-6.
28. Prazeres HJ, Rodrigues F, Figueiredo P, et al. Occurrence of the Cys611Tyr mutation and a novel Arg886Trp substitution in the RET proto-oncogene in multiple endocrine neoplasia type 2 families and sporadic medullary thyroid carcinoma cases originating from the central region of Portugal. *Clinical endocrinology* 2006;64:659-66.
29. Kim DD, Croxson MS, Cranshaw IM, Evans JL, Marquis-Nicholson R, Love DR. Indolent medullary thyroid cancer with a RET proto-oncogene Cys618Phe mutation presenting as sporadic unilateral pheochromocytoma in a 55-year-old Korean woman. *Thyroid : official journal of the American Thyroid Association* 2011;21:325-6.
30. Egawa S, Futami H, Takasaki K, et al. Genotype-phenotype correlation of patients with multiple endocrine neoplasia type 2 in Japan. *Japanese journal of clinical oncology* 1998;28:590-6.
31. Mulligan LM, Kwok JB, Healey CS, et al. Germ-line mutations of the RET proto-oncogene in multiple endocrine neoplasia type 2A. *Nature* 1993;363:458-60.
32. Mulligan LM, Eng C, Attie T, et al. Diverse phenotypes associated with exon 10 mutations of the RET proto-oncogene. *Human molecular genetics* 1994;3:2163-7.
33. Tsai MS, Ledger GA, Khosla S, Gharib H, Thibodeau SN. Identification of multiple endocrine neoplasia, type 2 gene carriers using linkage analysis and analysis of the RET proto-oncogene. *The Journal of clinical endocrinology and metabolism* 1994;78:1261-4.

34. Caron P, Attie T, David D, et al. C618R mutation in exon 10 of the RET proto-oncogene in a kindred with multiple endocrine neoplasia type 2A and Hirschsprung's disease. *The Journal of clinical endocrinology and metabolism* 1996;81:2731-3.
35. Lindskog S, Nilsson O, Jansson S, et al. Phenotypic expression of a family with multiple endocrine neoplasia type 2A due to a RET mutation at codon 618. *The British journal of surgery* 2004;91:713-8.
36. Takami H, Thosen T, Shirahama S, Ogura K, Hikiji K. Does the syndrome of familial medullary thyroid carcinoma describe a distinct clinical entity? *Eur J Cancer* 1998;34:1639-40.
37. Morita H, Daidoh H, Nagata K, et al. A family of multiple endocrine neoplasia type 2A: genetic analysis and clinical features. *Endocrine journal* 1996;43:25-30.
38. Moers AM, Landsvater RM, Schaap C, et al. Familial medullary thyroid carcinoma: not a distinct entity? Genotype-phenotype correlation in a large family. *The American journal of medicine* 1996;101:635-41.
39. Heinlen JE, Bueth DD, Culkin DJ, Slobodov G. Multiple endocrine neoplasia 2a presenting with pheochromocytoma and pituitary macroadenoma. *ISRN oncology* 2011;2011:732452.
40. Kitamura Y, Goodfellow PJ, Shimizu K, et al. Novel germline RET proto-oncogene mutations associated with medullary thyroid carcinoma (MTC): mutation analysis in Japanese patients with MTC. *Oncogene* 1997;14:3103-6.
41. Blaugrund JE, Johns MM, Jr., Eby YJ, et al. RET proto-oncogene mutations in inherited and sporadic medullary thyroid cancer. *Human molecular genetics* 1994;3:1895-7.
42. Sasaki Y, Shimotake T, Go S, Iwai N. Total thyroidectomy for hereditary medullary thyroid carcinoma 12 years after correction of Hirschsprung's disease. *The European journal of surgery = Acta chirurgica* 2001;167:467-9.
43. Karga HJ, Karayianni MK, Linos DA, Tseleni SC, Karaiskos KD, Papapetrou PD. Germ line mutation analysis in families with multiple endocrine neoplasia type 2A or familial medullary thyroid carcinoma. *European journal of endocrinology / European Federation of Endocrine Societies* 1998;139:410-5.
44. Dourisboure RJ, Belli S, Domenichini E, Podesta EJ, Eng C, Solano AR. Penetrance and clinical manifestations of non-hotspot germline RET mutation, C630R, in a family with medullary thyroid carcinoma. *Thyroid : official journal of the American Thyroid Association* 2005;15:668-71.
45. Machens A, Schneyer U, Holzhausen HJ, Raue F, Dralle H. Emergence of medullary thyroid carcinoma in a family with the Cys630Arg RET germline mutation. *Surgery* 2004;136:1083-7.
46. Yonekawa H, Sugitani I, Fujimoto Y, Arai M, Yamamoto N. A family of multiple endocrine neoplasia type 2A (MEN 2A) with Cys630Tyr RET germline mutation: report of a case. *Endocrine journal* 2007;54:531-5.
47. Beldjord C, Desclaux-Arramond F, Raffin-Sanson M, et al. The RET protooncogene in sporadic pheochromocytomas: frequent MEN 2-like mutations and new molecular defects. *The Journal of clinical endocrinology and metabolism* 1995;80:2063-8.

48. Bae SJ, Kim DJ, Kim JY, et al. A rare extracellular D631Y germline mutation of the RET proto-oncogene in two Korean families with multiple endocrine neoplasia 2A. *Thyroid : official journal of the American Thyroid Association* 2006;16:609-14.
49. Elston MS, Meyer-Rochow GY, Holdaway I, Conaglen JV. Patients with RET D631Y mutations most commonly present with pheochromocytoma and not medullary thyroid carcinoma. *Hormone and metabolic research = Hormon- und Stoffwechselforschung = Hormones et metabolisme* 2012;44:339-42.
50. Asai N, Iwashita T, Murakami H, et al. Mechanism of Ret activation by a mutation at aspartic acid 631 identified in sporadic pheochromocytoma. *Biochemical and biophysical research communications* 1999;255:587-90.
51. Sanso GE, Domene HM, Garcia R, et al. Very early detection of RET proto-oncogene mutation is crucial for preventive thyroidectomy in multiple endocrine neoplasia type 2 children: presence of C-cell malignant disease in asymptomatic carriers. *Cancer* 2002;94:323-30.
52. Schuffenecker I, Virally-Monod M, Brohet R, et al. Risk and penetrance of primary hyperparathyroidism in multiple endocrine neoplasia type 2A families with mutations at codon 634 of the RET proto-oncogene. *Groupe D'etude des Tumeurs a Calcitonine. The Journal of clinical endocrinology and metabolism* 1998;83:487-91.
53. Seri M, Celli I, Betsos N, Claudiani F, Camera G, Romeo G. A Cys634Gly substitution of the RET proto-oncogene in a family with recurrence of multiple endocrine neoplasia type 2A and cutaneous lichen amyloidosis. *Clinical genetics* 1997;51:86-90.
54. Eng C, Clayton D, Schuffenecker I, et al. The relationship between specific RET proto-oncogene mutations and disease phenotype in multiple endocrine neoplasia type 2. *International RET mutation consortium analysis. JAMA : the journal of the American Medical Association* 1996;276:1575-9.
55. Sanchez B, Robledo M, Biarnes J, et al. High prevalence of the C634Y mutation in the RET proto-oncogene in MEN 2A families in Spain. *Journal of medical genetics* 1999;36:68-70.
56. Gardner E, Mulligan LM, Eng C, et al. Haplotype analysis of MEN 2 mutations. *Human molecular genetics* 1994;3:1771-4.
57. Jindrichova S, Vcelak J, Vlcek P, Neradilova M, Nemecek J, Bendlova B. Screening of six risk exons of the RET proto-oncogene in families with medullary thyroid carcinoma in the Czech Republic. *The Journal of endocrinology* 2004;183:257-65.
58. Lips CJ, Landsvater RM, Hoppener JW, et al. From medical history and biochemical tests to presymptomatic treatment in a large MEN 2A family. *Journal of internal medicine* 1995;238:347-56.
59. Pinales MK, Graf H, Gross JL, Maia AL. RET codon 634 mutations in multiple endocrine neoplasia type 2: variable clinical features and clinical outcome. *The Journal of clinical endocrinology and metabolism* 2003;88:2644-9.
60. Milos IN, Frank-Raue K, Wohllk N, et al. Age-related neoplastic risk profiles and penetrance estimations in multiple endocrine neoplasia type 2A caused by germ line RET Cys634Trp (TGC>TGG) mutation. *Endocrine-related cancer* 2008;15:1035-41.
61. Lips CJ, Landsvater RM, Hoppener JW, et al. Clinical screening as compared with DNA analysis in families with multiple endocrine neoplasia type 2A. *The New England journal of medicine* 1994;331:828-35.



62. Colombo-Benkmann M, Li Z, Riemann B, et al. Characterization of the RET protooncogene transmembrane domain mutation S649L associated with nonaggressive medullary thyroid carcinoma. *European journal of endocrinology / European Federation of Endocrine Societies* 2008;158:811-6.
63. Wiench M, Wygoda Z, Gubala E, et al. Estimation of risk of inherited medullary thyroid carcinoma in apparent sporadic patients. *Journal of clinical oncology : official journal of the American Society of Clinical Oncology* 2001;19:1374-80.
64. Vierhapper H, Bieglmayer C, Heinze G, Baumgartner-Parzer S. Frequency of RET proto-oncogene mutations in patients with normal and with moderately elevated pentagastrin-stimulated serum concentrations of calcitonin. *Thyroid : official journal of the American Thyroid Association* 2004;14:580-3.
65. Ahmed SA, Snow-Bailey K, Highsmith WE, Sun W, Fenwick RG, Mao R. Nine novel germline gene variants in the RET proto-oncogene identified in twelve unrelated cases. *The Journal of molecular diagnostics : JMD* 2005;7:283-8.
66. Borrello MG, Aiello A, Peissel B, et al. Functional characterization of the MTC-associated germline RET-K666E mutation: evidence of oncogenic potential enhanced by the G691S polymorphism. *Endocrine-related cancer* 2011;18:519-27.
67. Berndt I, Reuter M, Saller B, et al. A new hot spot for mutations in the ret protooncogene causing familial medullary thyroid carcinoma and multiple endocrine neoplasia type 2A. *The Journal of clinical endocrinology and metabolism* 1998;83:770-4.
68. Gimm O, Niederle BE, Weber T, et al. RET proto-oncogene mutations affecting codon 790/791: A mild form of multiple endocrine neoplasia type 2A syndrome? *Surgery* 2002;132:952-9; discussion 9.
69. Frank-Raue K, Machens A, Scheuba C, Niederle B, Dralle H, Raue F. Difference in development of medullary thyroid carcinoma among carriers of RET mutations in codons 790 and 791. *Clinical endocrinology* 2008;69:259-63.
70. Vierhapper H, Rondot S, Schulze E, et al. Primary hyperparathyroidism as the leading symptom in a patient with a Y791F RET mutation. *Thyroid : official journal of the American Thyroid Association* 2005;15:1303-8.
71. Nilsson O, Tisell LE, Jansson S, Ahlman H, Gimm O, Eng C. Adrenal and extra-adrenal pheochromocytomas in a family with germline RET V804L mutation. *JAMA : the journal of the American Medical Association* 1999;281:1587-8.
72. Learoyd DL, Gosnell J, Elston MS, et al. Experience of prophylactic thyroidectomy in multiple endocrine neoplasia type 2A kindreds with RET codon 804 mutations. *Clinical endocrinology* 2005;63:636-41.
73. Lesueur F, Cebrian A, Cranston A, et al. Germline homozygous mutations at codon 804 in the RET protooncogene in medullary thyroid carcinoma/multiple endocrine neoplasia type 2A patients. *The Journal of clinical endocrinology and metabolism* 2005;90:3454-7.
74. Shifrin AL, Xenachis C, Fay A, Matulewicz TJ, Kuo YH, Vernick JJ. One hundred and seven family members with the rearranged during transfection V804M proto-oncogene mutation presenting with simultaneous medullary and papillary thyroid carcinomas, rare primary hyperparathyroidism, and no pheochromocytomas: is this a new syndrome--MEN 2C? *Surgery* 2009;146:998-1005.

75. Recasens M, Oriola J, Fernandez-Real JM, et al. Asymptomatic bilateral adrenal pheochromocytoma in a patient with a germline V804M mutation in the RET proto-oncogene. *Clinical endocrinology* 2007;67:29-33.
76. Foppiani L, Forzano F, Ceccherini I, et al. Uncommon association of germline mutations of RET proto-oncogene and CDKN2A gene. *European journal of endocrinology / European Federation of Endocrine Societies* 2008;158:417-22.
77. Patocs A, Klein I, Szilvasi A, et al. Genotype-phenotype correlations in Hungarian patients with hereditary medullary thyroid cancer. *Wiener klinische Wochenschrift* 2006;118:417-21.
78. Pinna G, Orgiana G, Riola A, et al. RET proto-oncogene in Sardinia: V804M is the most frequent mutation and may be associated with FMTC/MEN-2A phenotype. *Thyroid : official journal of the American Thyroid Association* 2007;17:101-4.
79. Hoie J, Heimdal K, Nesland JM, Bormer O. [Prophylactic thyroidectomy in carriers of RET oncogene mutation carriers]. *Tidsskrift for den Norske laegeforening : tidsskrift for praktisk medicin, ny raekke* 2000;120:3249-52.
80. Gibelin H, Bezieau S, Misso C, Bouin-Pineau MH, Marechaud R, Kraimps JL. Germline RET V804M mutation associated with multiple endocrine neoplasia type 2A. *The British journal of surgery* 2004;91:1458-9.
81. Bugalho MJ, Domingues R, Santos JR, Catarino AL, Sobrinho L. Mutation analysis of the RET proto-oncogene and early thyroidectomy: results of a Portuguese cancer centre. *Surgery* 2007;141:90-5.
82. Rodriguez JM, Balsalobre M, Ponce JL, et al. Pheochromocytoma in MEN 2A syndrome. Study of 54 patients. *World journal of surgery* 2008;32:2520-6.
83. Jimenez C, Habra MA, Huang SC, et al. Pheochromocytoma and medullary thyroid carcinoma: a new genotype-phenotype correlation of the RET protooncogene 891 germline mutation. *The Journal of clinical endocrinology and metabolism* 2004;89:4142-5.
84. Schulte KM, Machens A, Fugazzola L, et al. The clinical spectrum of multiple endocrine neoplasia type 2a caused by the rare intracellular RET mutation S891A. *The Journal of clinical endocrinology and metabolism* 2010;95:E92-7.
85. Yao B, Liu X, Liang H, et al. A novel mutation (D631del) of the RET gene was associated with MEN2A in a Chinese pedigree. *Endocrine journal* 2009;56:99-104.
86. Quadro L, Fattoruso O, Cosma MP, et al. Loss of heterozygosity at the RET protooncogene locus in a case of multiple endocrine neoplasia type 2A. *The Journal of clinical endocrinology and metabolism* 2001;86:239-44.
87. Hoppner W, Dralle H, Brabant G. Duplication of 9 base pairs in the critical cysteine-rich domain of the RET proto-oncogene causes multiple endocrine neoplasia type 2A. *Human mutation* 1998;Suppl 1:S128-30.
88. Hoppner W, Ritter MM. A duplication of 12 bp in the critical cysteine rich domain of the RET proto-oncogene results in a distinct phenotype of multiple endocrine neoplasia type 2A. *Human molecular genetics* 1997;6:587-90.
89. Dvorakova S, Vaclavikova E, Ryska A, et al. Double germline mutations in the RET Proto-oncogene in MEN 2A and MEN 2B kindreds. *Experimental and clinical endocrinology & diabetes : official journal, German Society of Endocrinology [and] German Diabetes Association* 2006;114:192-6.

90. Poturnajova M, Altanerova V, Kostalova L, Breza J, Altaner C. Novel germline mutation in the transmembrane region of RET gene close to Cys634Ser mutation associated with MEN 2A syndrome. *J Mol Med (Berl)* 2005;83:287-95.
91. Nunes AB, Ezabella MC, Pereira AC, Krieger JE, Toledo SP. A novel Val648Ile substitution in RET protooncogene observed in a Cys634Arg multiple endocrine neoplasia type 2A kindred presenting with an adrenocorticotropin-producing pheochromocytoma. *The Journal of clinical endocrinology and metabolism* 2002;87:5658-61.
92. Tessitore A, Sinisi AA, Pasquali D, et al. A novel case of multiple endocrine neoplasia type 2A associated with two de novo mutations of the RET protooncogene. *The Journal of clinical endocrinology and metabolism* 1999;84:3522-7.
93. Toledo RA, Wagner SM, Coutinho FL, et al. High penetrance of pheochromocytoma associated with the novel C634Y/Y791F double germline mutation in the RET protooncogene. *The Journal of clinical endocrinology and metabolism* 2010;95:1318-27.
94. Marsh DJ, Andrew SD, Eng C, et al. Germline and somatic mutations in an oncogene: RET mutations in inherited medullary thyroid carcinoma. *Cancer research* 1996;56:1241-3.
95. Koch CA, Huang SC, Vortmeyer AO, Zhuang Z, Chrousos GP, Pacak K. A patient with MEN 2 and multiple mutations of RET in the germline. *Experimental and clinical endocrinology & diabetes : official journal, German Society of Endocrinology [and] German Diabetes Association* 2000;108:493.
96. Conzo G, Circelli L, Pasquali D, et al. Lessons to be learned from the clinical management of a MEN 2A patient bearing a novel 634/640/700 mutation of the RET proto-oncogene. *Clinical endocrinology* 2012;77:934-6.
97. Qi XP, Ma JM, Du ZF, et al. RET germline mutations identified by exome sequencing in a Chinese multiple endocrine neoplasia type 2A/familial medullary thyroid carcinoma family. *PloS one* 2011;6:e20353.
98. Brandi ML, Gagel RF, Angeli A, et al. Guidelines for diagnosis and therapy of MEN type 1 and type 2. *The Journal of clinical endocrinology and metabolism* 2001;86:5658-71.
99. Siggelkow H, Melzer A, Nolte W, Karsten K, Hoppner W, Hufner M. Presentation of a kindred with familial medullary thyroid carcinoma and Cys611Phe mutation of the RET proto-oncogene demonstrating low grade malignancy. *European journal of endocrinology / European Federation of Endocrine Societies* 2001;144:467-73.
100. Miyauchi A, Egawa S, Futami H, Kuma K, Obara T, Yamaguchi K. A novel somatic mutation in the RET proto-oncogene in familial medullary thyroid carcinoma with a germline codon 768 mutation. *Japanese journal of cancer research : Gann* 1997;88:527-31.
101. Shirahama S, Ogura K, Takami H, et al. Mutational analysis of the RET proto-oncogene in 71 Japanese patients with medullary thyroid carcinoma. *Journal of human genetics* 1998;43:101-6.
102. Dabir T, Hunter SJ, Russell CF, McCall D, Morrison PJ. The RET mutation E768D confers a late-onset familial medullary thyroid carcinoma -- only phenotype with incomplete penetrance: implications for screening and management of carrier status. *Familial cancer* 2006;5:201-4.

103. Eng C, Smith DP, Mulligan LM, et al. A novel point mutation in the tyrosine kinase domain of the RET proto-oncogene in sporadic medullary thyroid carcinoma and in a family with FMTC. *Oncogene* 1995;10:509-13.
104. Boccia LM, Green JS, Joyce C, Eng C, Taylor SA, Mulligan LM. Mutation of RET codon 768 is associated with the FMTC phenotype. *Clinical genetics* 1997;51:81-5.
105. Jimenez C, Dang GT, Schultz PN, et al. A novel point mutation of the RET protooncogene involving the second intracellular tyrosine kinase domain in a family with medullary thyroid carcinoma. *The Journal of clinical endocrinology and metabolism* 2004;89:3521-6.
106. Dvorakova S, Vaclavikova E, Duskova J, Vlcek P, Ryska A, Bendlova B. Exon 5 of the RET proto-oncogene: a newly detected risk exon for familial medullary thyroid carcinoma, a novel germ-line mutation Gly321Arg. *Journal of endocrinological investigation* 2005;28:905-9.
107. Fazioli F, Piccinini G, Appolloni G, et al. A new germline point mutation in Ret exon 8 (cys515ser) in a family with medullary thyroid carcinoma. *Thyroid : official journal of the American Thyroid Association* 2008;18:775-82.
108. Rey JM, Brouillet JP, Fonteneau-Allaire J, et al. Novel germline RET mutation segregating with papillary thyroid carcinomas. *Genes, chromosomes & cancer* 2001;32:390-1.
109. Ercolino T, Lombardi A, Becherini L, et al. The Y606C RET mutation causes a receptor gain of function. *Clinical endocrinology* 2008;69:253-8.
110. Oriola J, Paramo C, Halperin I, Garcia-Mayor RV, Rivera-Fillat F. Novel point mutation in exon 10 of the RET proto-oncogene in a family with medullary thyroid carcinoma. *American journal of medical genetics* 1998;78:271-3.
111. Mastroianno S, Torlontano M, Scillitani A, et al. Coexistence of multiple endocrine neoplasia type 1 and type 2 in a large Italian family. *Endocrine* 2011;40:481-5.
112. Frank-Raue K, Dohring J, Scheumann G, et al. New mutations in the RET protooncogene-L881V - associated with medullary thyroid carcinoma and -R770Q - in a patient with mixed medullar/follicular thyroid tumour. *Experimental and clinical endocrinology & diabetes : official journal, German Society of Endocrinology [and] German Diabetes Association* 2010;118:550-3.
113. Maschek W, Pichler R, Rieger R, Weinhausel A, Berg J. A new identified germline mutation of the RET proto-oncogene responsible for familial medullary thyroid carcinoma in co-existence with a hyperfunctioning autonomous nodule. *Clinical endocrinology* 2002;56:823.
114. D'Aloiso L, Carlomagno F, Bisceglia M, et al. Clinical case seminar: in vivo and in vitro characterization of a novel germline RET mutation associated with low-penetrant nonaggressive familial medullary thyroid carcinoma. *The Journal of clinical endocrinology and metabolism* 2006;91:754-9.
115. Pigny P, Bauters C, Wemeau JL, et al. A novel 9-base pair duplication in RET exon 8 in familial medullary thyroid carcinoma. *The Journal of clinical endocrinology and metabolism* 1999;84:1700-4.
116. Muzza M, Cordella D, Bombled J, et al. Four novel RET germline variants in exons 8 and 11 display an oncogenic potential in vitro. *European journal of endocrinology / European Federation of Endocrine Societies* 2010;162:771-7.

117. Cordella D, Muzza M, Alberti L, et al. An in-frame complex germline mutation in the juxtamembrane intracellular domain causing RET activation in familial medullary thyroid carcinoma. *Endocrine-related cancer* 2006;13:945-53.
118. Bartsch DK, Hasse C, Schug C, Barth P, Rothmund M, Hoppner W. A RET double mutation in the germline of a kindred with FMTC. *Experimental and clinical endocrinology & diabetes : official journal, German Society of Endocrinology [and] German Diabetes Association* 2000;108:128-32.
119. Kasprzak L, Nolet S, Gaboury L, et al. Familial medullary thyroid carcinoma and prominent corneal nerves associated with the germline V804M and V778I mutations on the same allele of RET. *Journal of medical genetics* 2001;38:784-7.
120. Lombardo F, Baudin E, Chiefari E, et al. Familial medullary thyroid carcinoma: clinical variability and low aggressiveness associated with RET mutation at codon 804. *The Journal of clinical endocrinology and metabolism* 2002;87:1674-80.
121. Lecube A, Hernandez C, Oriola J, et al. V804M RET mutation and familial medullary thyroid carcinoma: report of a large family with expression of the disease only in the homozygous gene carriers. *Surgery* 2002;131:509-14.
122. Elisei R, Cosci B, Romei C, et al. Identification of a novel point mutation in the RET gene (Ala883Thr), which is associated with medullary thyroid carcinoma phenotype only in homozygous condition. *The Journal of clinical endocrinology and metabolism* 2004;89:5823-7.
123. Saez ME, Ruiz A, Cebrian A, et al. A new germline mutation, R600Q, within the coding region of RET proto-oncogene: a rare polymorphism or a MEN 2 causing mutation? *Human mutation* 2000;15:122.
124. Siegelman M, Mohabeer A, Fahey TJ, 3rd, et al. Rapid, nonradioactive screening for mutations in exons 10, 11, and 16 of the RET protooncogene associated with inherited medullary thyroid carcinoma. *Clinical chemistry* 1997;43:453-7.
125. Komminoth P, Kunz EK, Matias-Guiu X, et al. Analysis of RET protooncogene point mutations distinguishes heritable from nonheritable medullary thyroid carcinomas. *Cancer* 1995;76:479-89.
126. Machens A, Niccoli-Sire P, Hoegel J, et al. Early malignant progression of hereditary medullary thyroid cancer. *The New England journal of medicine* 2003;349:1517-25.
127. Frank-Raue K, Rondot S, Schulze E, Raue F. Change in the spectrum of RET mutations diagnosed between 1994 and 2006. *Clinical laboratory* 2007;53:273-82.
128. Miyauchi A, Matsuzuka F, Hirai K, et al. Prospective trial of unilateral surgery for nonhereditary medullary thyroid carcinoma in patients without germline RET mutations. *World journal of surgery* 2002;26:1023-8.
129. Cranston A, Carniti C, Martin S, et al. A novel activating mutation in the RET tyrosine kinase domain mediates neoplastic transformation. *Mol Endocrinol* 2006;20:1633-43.
130. Elisei R, Romei C, Cosci B, et al. RET genetic screening in patients with medullary thyroid cancer and their relatives: experience with 807 individuals at one center. *The Journal of clinical endocrinology and metabolism* 2007;92:4725-9.
131. Smith DP, Houghton C, Ponder BA. Germline mutation of RET codon 883 in two cases of de novo MEN 2B. *Oncogene* 1997;15:1213-7.

132. Gimm O, Marsh DJ, Andrew SD, et al. Germline dinucleotide mutation in codon 883 of the RET proto-oncogene in multiple endocrine neoplasia type 2B without codon 918 mutation. *The Journal of clinical endocrinology and metabolism* 1997;82:3902-4.
133. Eng C, Smith DP, Mulligan LM, et al. Point mutation within the tyrosine kinase domain of the RET proto-oncogene in multiple endocrine neoplasia type 2B and related sporadic tumours. *Human molecular genetics* 1994;3:237-41.
134. Hofstra RM, Landsvater RM, Ceccherini I, et al. A mutation in the RET proto-oncogene associated with multiple endocrine neoplasia type 2B and sporadic medullary thyroid carcinoma. *Nature* 1994;367:375-6.
135. Carlson KM, Dou S, Chi D, et al. Single missense mutation in the tyrosine kinase catalytic domain of the RET protooncogene is associated with multiple endocrine neoplasia type 2B. *Proceedings of the National Academy of Sciences of the United States of America* 1994;91:1579-83.
136. Miyauchi A, Futami H, Hai N, et al. Two germline missense mutations at codons 804 and 806 of the RET proto-oncogene in the same allele in a patient with multiple endocrine neoplasia type 2B without codon 918 mutation. *Japanese journal of cancer research : Gann* 1999;90:1-5.
137. Iwashita T, Murakami H, Kurokawa K, et al. A two-hit model for development of multiple endocrine neoplasia type 2B by RET mutations. *Biochemical and biophysical research communications* 2000;268:804-8.
138. Cranston AN, Carniti C, Oakhill K, et al. RET is constitutively activated by novel tandem mutations that alter the active site resulting in multiple endocrine neoplasia type 2B. *Cancer research* 2006;66:10179-87.
139. Menko FH, van der Luijt RB, de Valk IA, et al. Atypical MEN type 2B associated with two germline RET mutations on the same allele not involving codon 918. *The Journal of clinical endocrinology and metabolism* 2002;87:393-7.
140. Nakao K. ICE/ECE. *European Society of Endocrinology*; 2012; Florence, Italy; 2012.
141. Kitamura Y, Scavarda N, Wells SA, Jr., Jackson CE, Goodfellow PJ. Two maternally derived missense mutations in the tyrosine kinase domain of the RET protooncogene in a patient with de novo MEN 2B. *Human molecular genetics* 1995;4:1987-8.

This Table was reproduced from: Wells, SA, Jr, Pacini F, Robinson BG, and Santoro. Multiple Endocrine Neoplasia and Familial Medullary Thyroid Carcinoma: An Update. *Journal of Clinical Endocrinology and Metabolism*, 98: 3149-3164, 2013. With permission from the Endocrine Society.
